# Supplementary material for: Matrix metalloproteinase-7 facilitates immune access to the CNS in experimental autoimmune encephalomyelitis
Source: PubMed Central journal article supplement (PMC2660336; doi:10.1186/1471-2202-10-17), 2009-03-06

Supplemental Figure 3

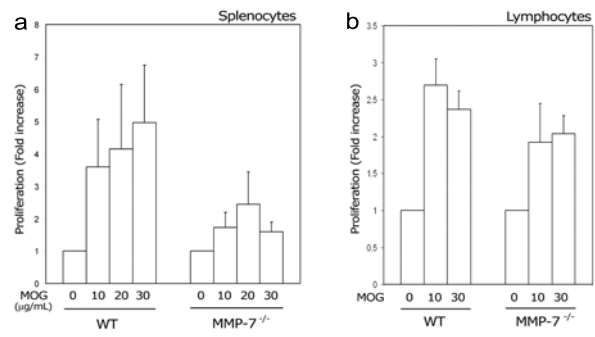

Supplement: 1471-2202-10-17-S3.pdf [file 1471-2202-10-17-S3.pdf]
